# Supplementary material for: Complexation of trivalent americium and lanthanides with terdentate ‘N’ donor ligands: the role of rigidity in the ligand structure
Source: Royal Society of Chemistry journal article supplement (doi:10.1039/c4dt01342e), 2014-01-01

**ESI-1:** Lifetime spectra of Eu(III) complexes of Me<sub>2</sub>TBipy and Me<sub>2</sub>TPhen (M:L = 1:10) in acetonitrile ( $\lambda_{\text{ex}} = 247 \text{ nm}$ ,  $\lambda_{\text{em}} = 616 \text{ nm}$ )

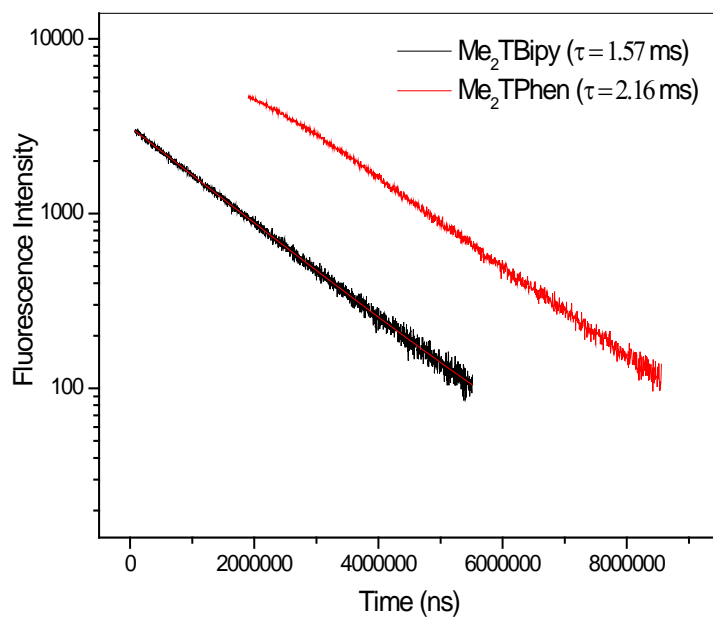

**ESI-2:** The species identified from the ESI-MS spectra of  $\text{Ln}^{3+}$  complexes of  $\text{Me}_2\text{TBipy}$  and  $\text{Me}_2\text{TPhen}$  in acetonitrile medium (L =  $\text{Me}_2\text{TBipy}/\text{Me}_2\text{TPhen}$ , S = acetonitrile, W = water)

| $\text{Ln}^{3+}$ | $\text{Me}_2\text{TBipy}$                                 |              | $\text{Me}_2\text{TPhen}$                             |              |
|------------------|-----------------------------------------------------------|--------------|-------------------------------------------------------|--------------|
|                  | Species                                                   | m/z          | Species                                               | m/z          |
| $\text{La}^{3+}$ | $[\text{LaL}(\text{NO}_3)_2(\text{S})_3(\text{W})_3]^+$   | 705.0 (100%) | $[\text{HL}]^+$                                       | 288.1 (100%) |
|                  | $[\text{HL}]^+$                                           | 264.1        | $[(\text{HL})_2.\text{HNO}_3]^{2+}$                   | 319.1        |
|                  |                                                           |              | $[\text{LaL}(\text{NO}_3)_2(\text{W})(\text{S})_3]^+$ | 690.8        |
|                  |                                                           |              |                                                       |              |
| $\text{Eu}^{3+}$ | $[\text{HL}]^+$                                           | 264.1 (100%) | $[(\text{HL})_2.\text{HNO}_3]^{2+}$                   | 319.1 (100%) |
|                  | $[(\text{HL})_2.\text{HNO}_3]^{2+}$                       | 295.1        | $[\text{HL}]^+$                                       | 288.1        |
|                  | $[\text{EuL}_2(\text{NO}_3)_2(\text{S})_2(\text{W})_3]^+$ | 938.8        | $[\text{EuL}_2(\text{NO}_3)_2]^+$                     | 851.5        |
|                  | $[\text{EuL}_2(\text{NO}_3)_2(\text{W})]^+$               | 821.4        | $[\text{EuL}_2(\text{NO}_3)]^{2+}$                    | 395.1        |
| $\text{Er}^{3+}$ | $[\text{HL}]^+$                                           | 264.1 (100%) | $[(\text{HL})_2.\text{HNO}_3]^{2+}$                   | 319.1 (100%) |
|                  | $[(\text{HL})_2.\text{HNO}_3]^{2+}$                       | 295.1        | $[\text{HL}]^+$                                       | 288.1        |
|                  | $[\text{ErL}(\text{NO}_3)_2(\text{W})_2]^+$               | 589.4        |                                                       |              |
|                  | $[\text{ErL}_2(\text{NO}_3)_2(\text{W})_2]^+$             | 853.8        | $[\text{ErL}_2(\text{NO}_3)_2]^+$                     | 865.8        |

ESI-3: ESI-MS spectra of  $1 \times 10^{-3} \text{M}$   $\text{La}(\text{NO}_3)_3$  and  $1 \times 10^{-3} \text{M}$  of  $\text{Me}_2\text{TBipy}$  in acetonitrile

Spectrum Plot - 1/8/2014 10:56 AM

1 A Scan 15 from c:\data\external\lcms-66\sample-1-705.xms

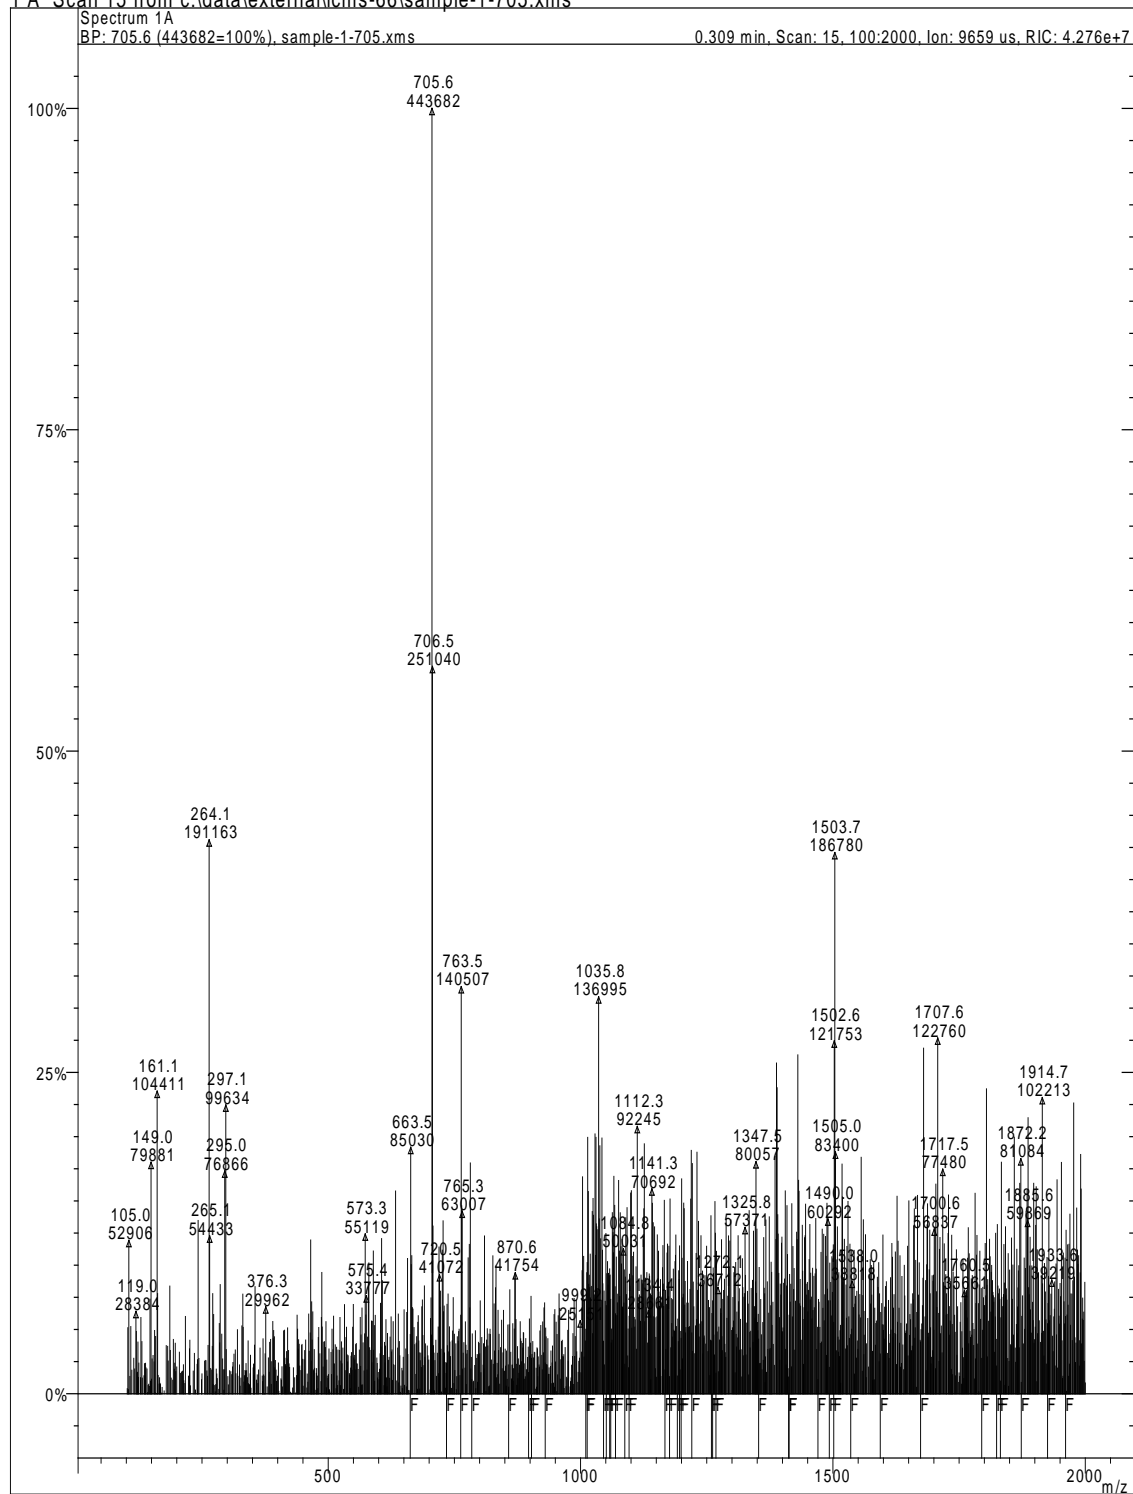

**ESI -4:** MS-MS spectra for the peak at  $m/z = 705.6$  of  $1 \times 10^{-3} \text{M}$   $\text{La}(\text{NO}_3)_3$  and  $1 \times 10^{-3} \text{M}$  of  $\text{Me}_2\text{TBipy}$  in acetonitrile

Spectrum Plot - 1/8/2014 10:55 AM

1 A Scan 6 from c:\data\external\lcms-66\sample-1-705-msms.xms

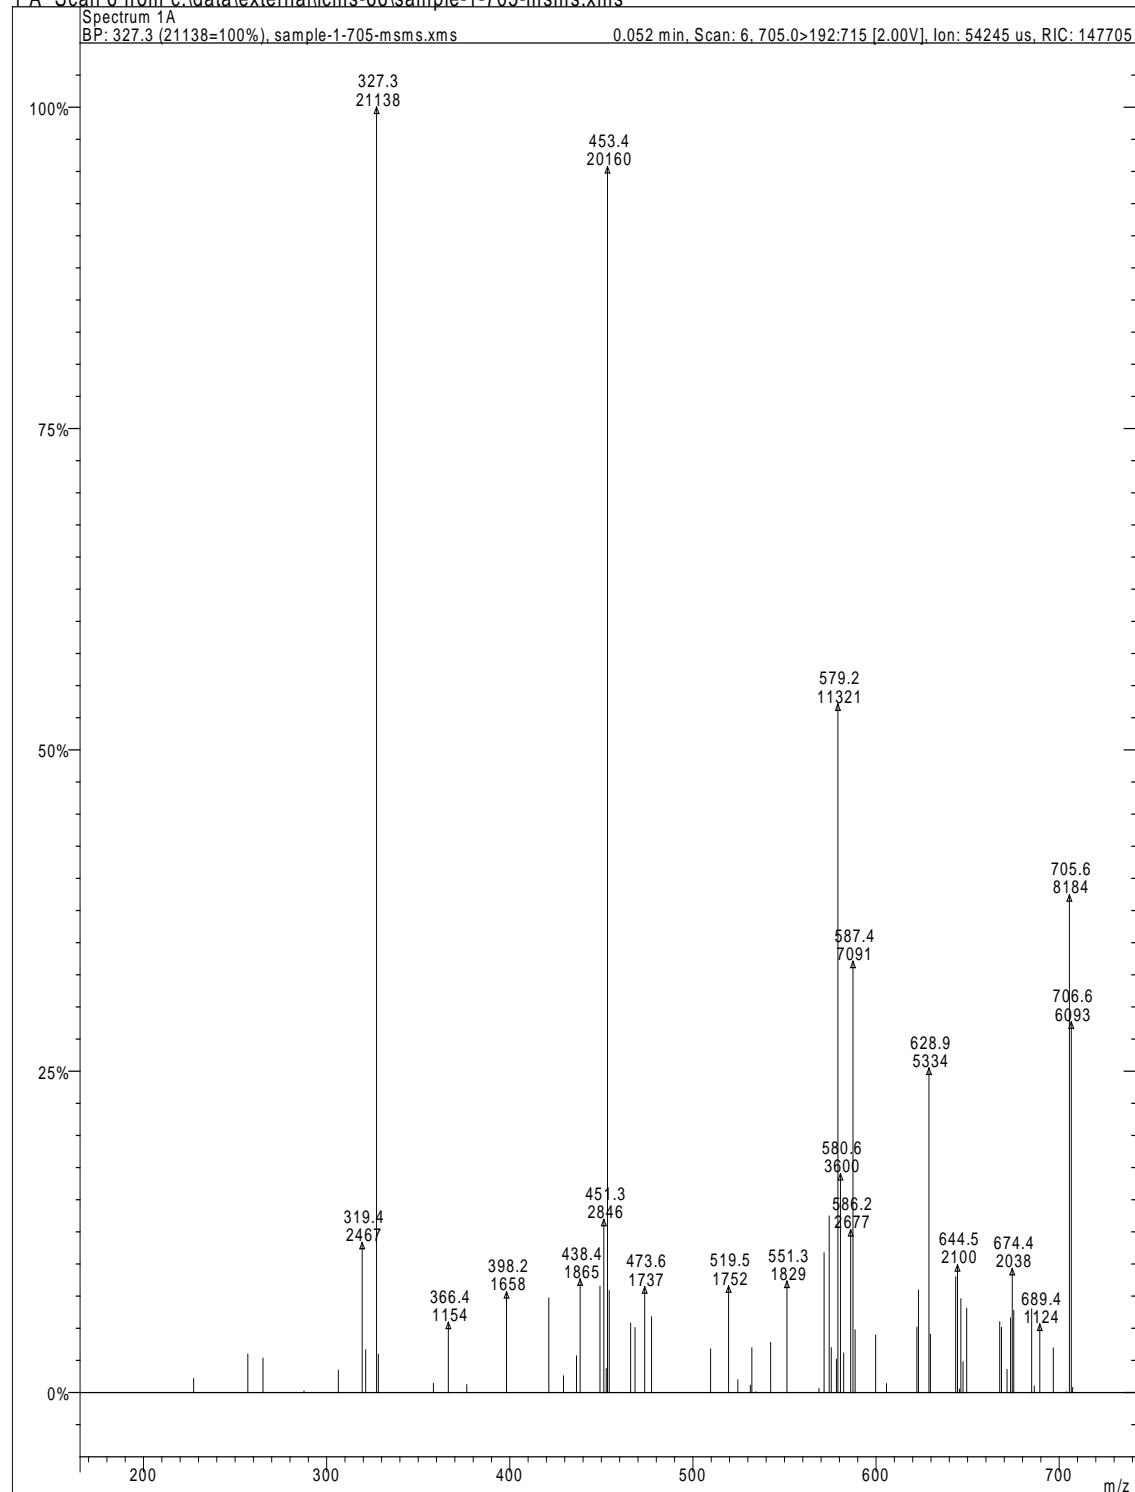

**ESI-5:** ESI-MS spectra of  $1 \times 10^{-3} \text{M}$   $\text{Eu}(\text{NO}_3)_3$  and  $1 \times 10^{-3} \text{M}$  of  $\text{Me}_2\text{TBipy}$  in acetonitrile

Spectrum Plot - 1/8/2014 11:03 AM

1 A Scan 35 from c:\data\external\lcms-66\sample-5.xms

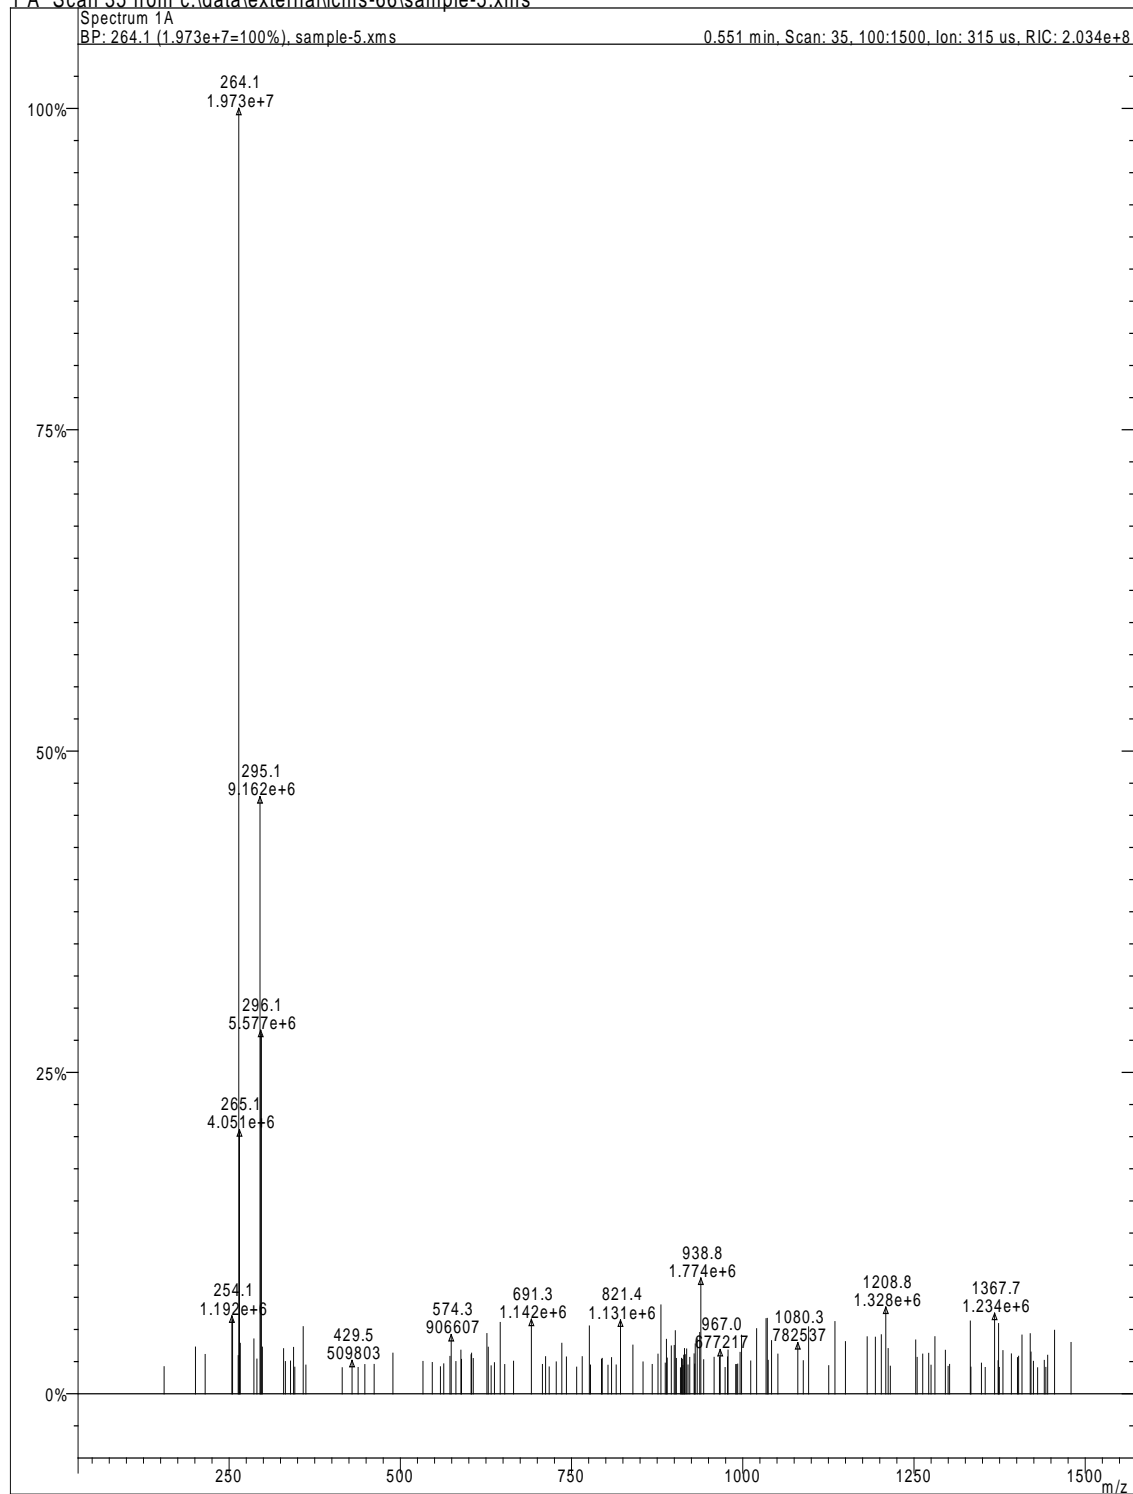

ESI-6: ESI-MS spectra of  $1 \times 10^{-3}$  M  $\text{Eu}(\text{NO}_3)_3$  and  $1 \times 10^{-3}$  M of  $\text{Me}_2\text{TPhen}$  in acetonitrile

Spectrum Plot - 1/8/2014 11:04 AM

1 A Scan 40 from c:\data\external\lcms-66\sample-6.xms

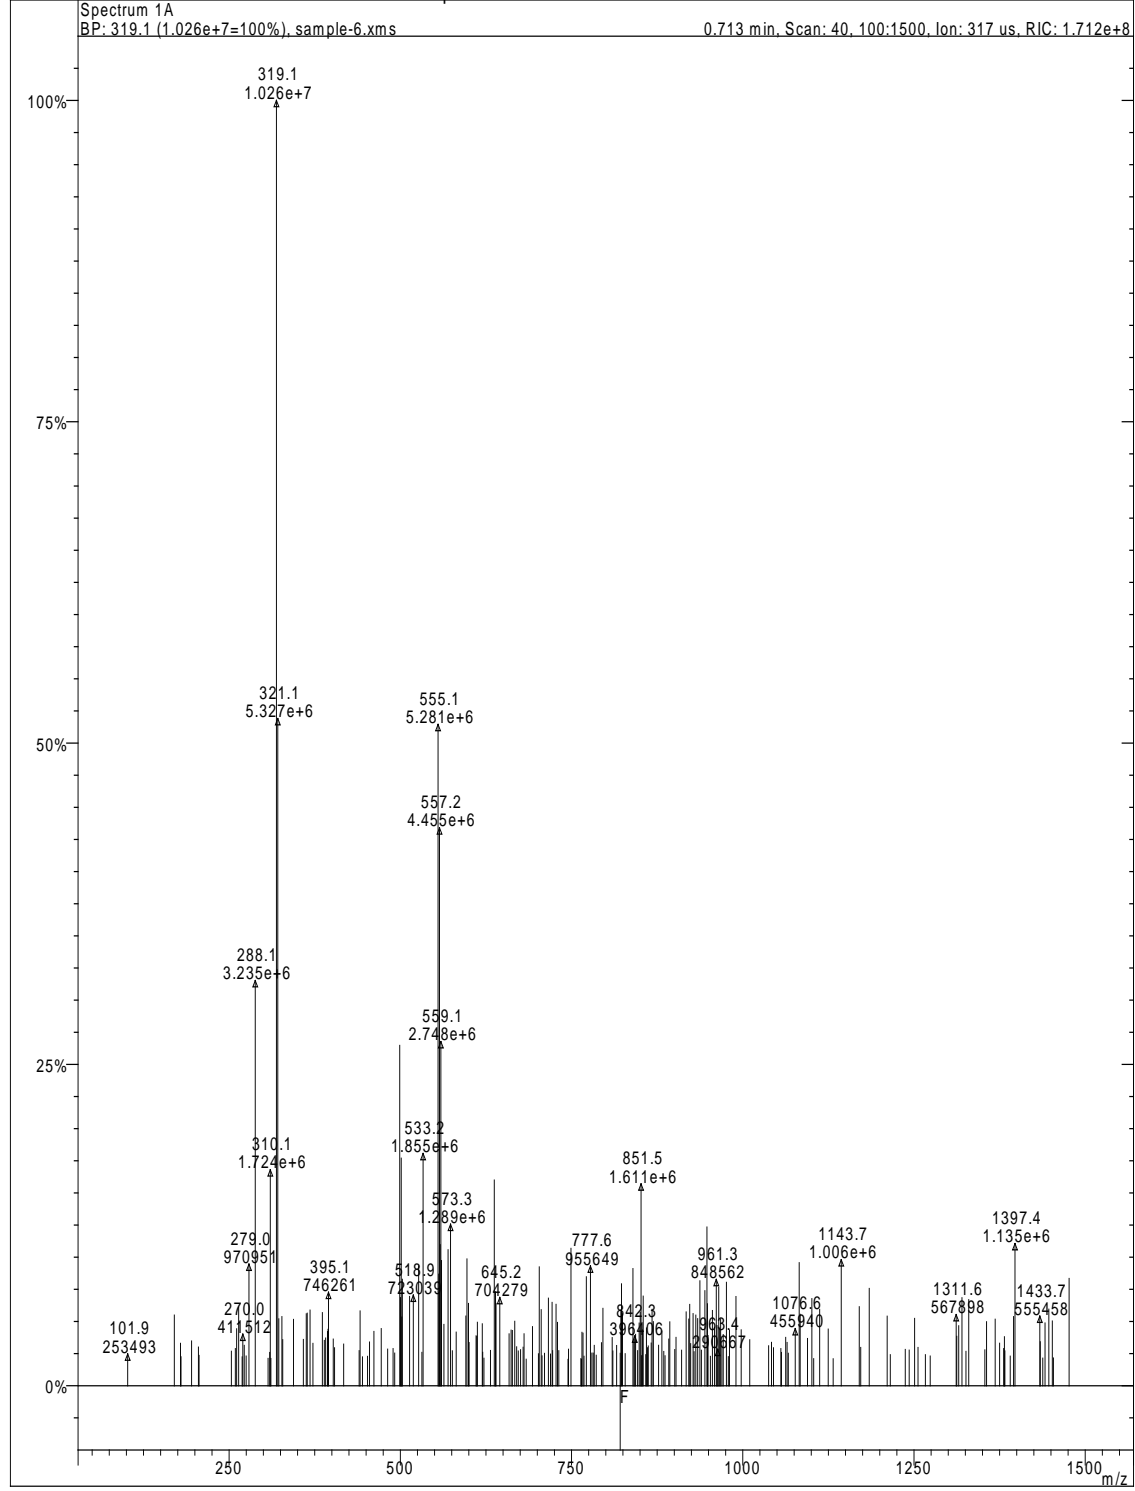

**ESI-7:** ESI-MS spectra of  $1 \times 10^{-3} \text{ M Er(NO}_3)_3$  and  $1 \times 10^{-3} \text{ M}$  of  $\text{Me}_2\text{TBipy}$  in acetonitrile

Spectrum Plot - 1/8/2014 11:08 AM

1 A Scan 32 from c:\data\external\lcms-66\sample-9.xms

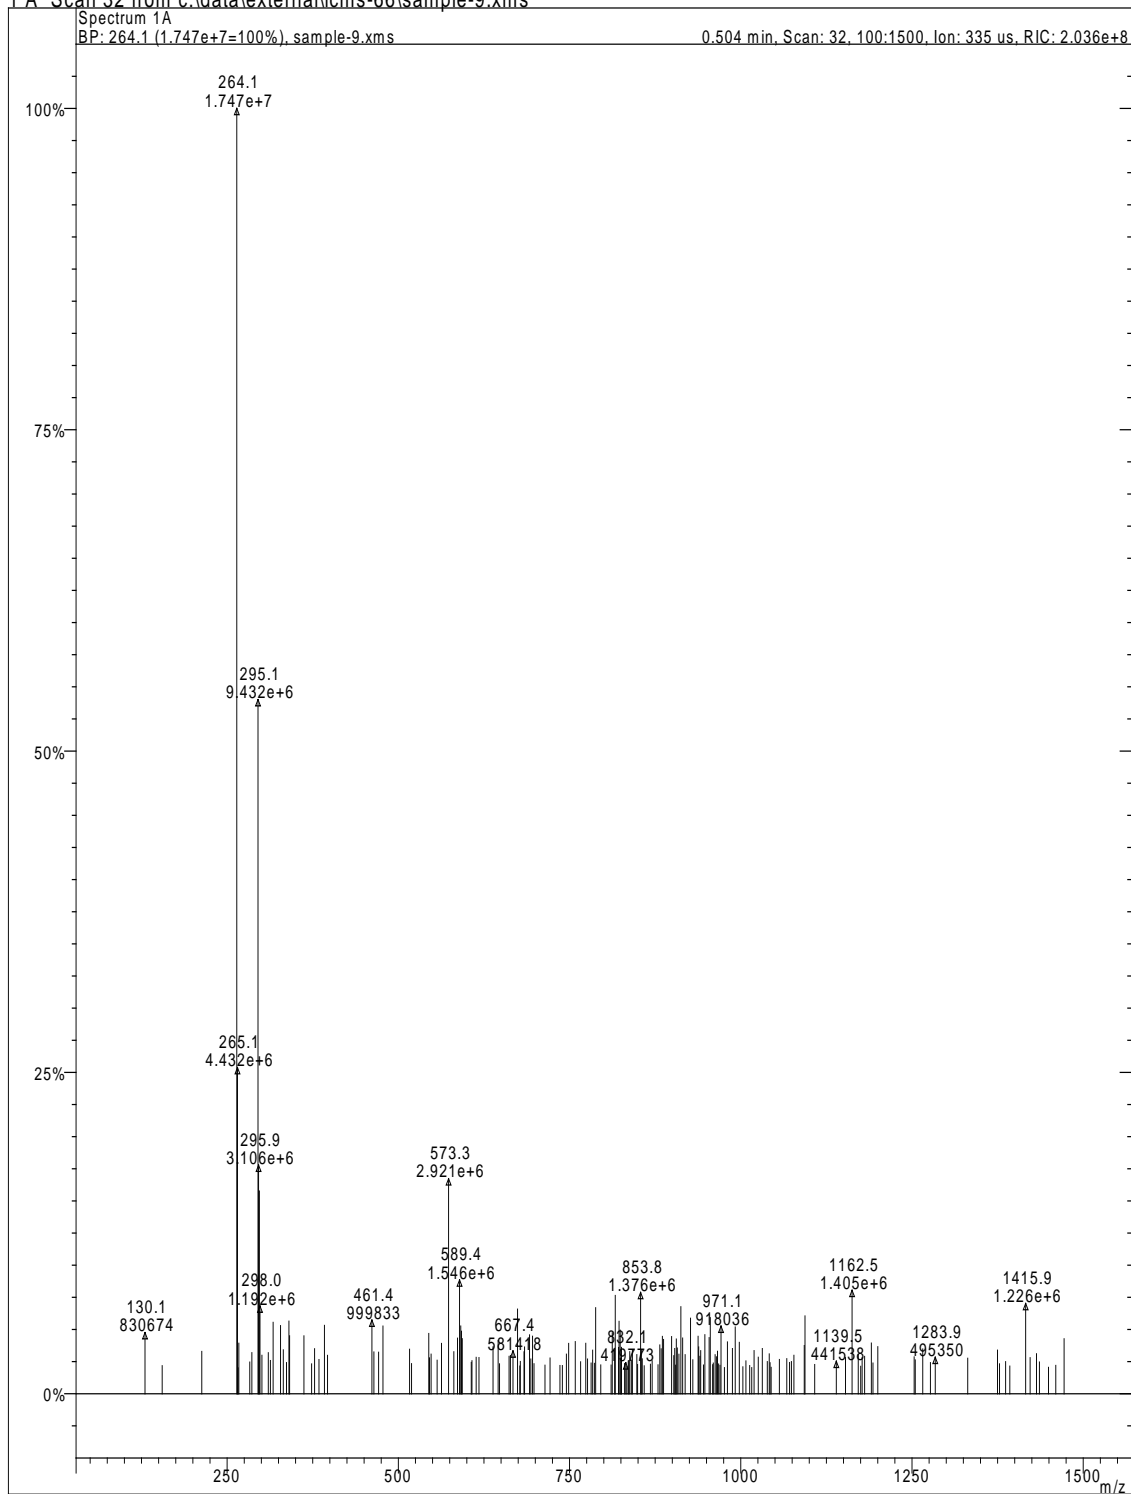

**ESI-8:** ESI-MS spectra of  $1 \times 10^{-3}$  M  $\text{Er}(\text{NO}_3)_3$  and  $1 \times 10^{-3}$  M of  $\text{Me}_2\text{TPhen}$  in acetonitrile

Spectrum Plot - 1/8/2014 11:08 AM

1 A Scan 24 from c:\data\external\lcms-66\sample-10.xms

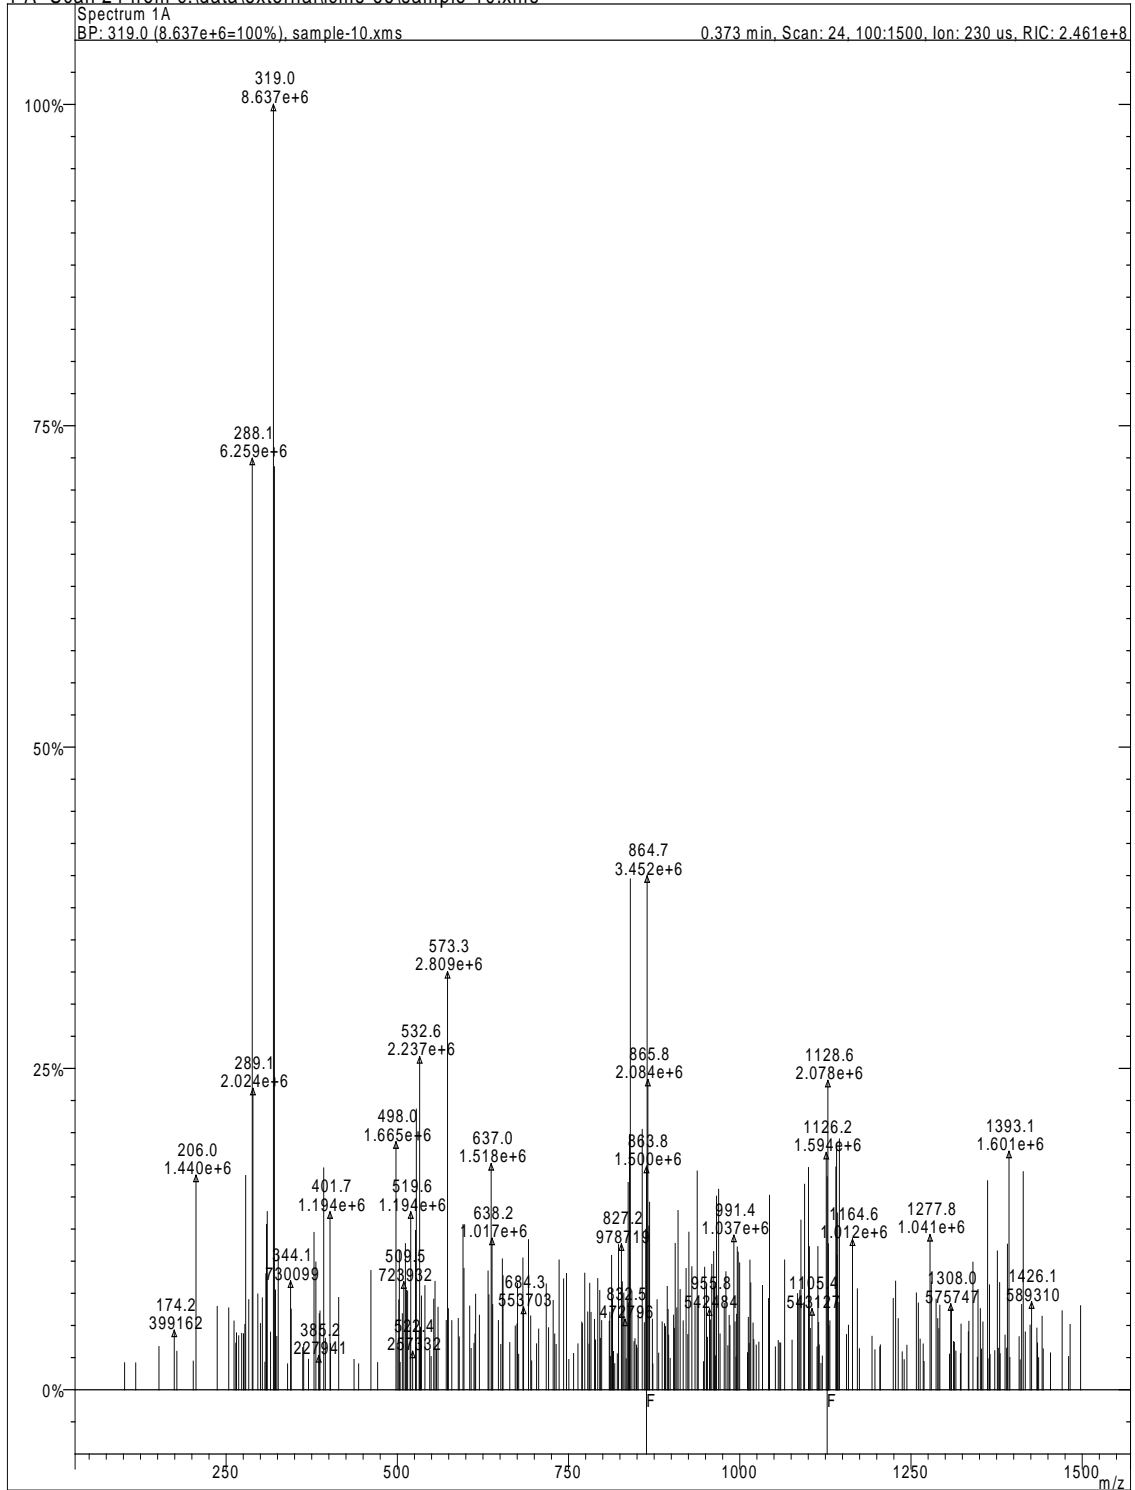



**ESI -9:** MS-MS spectra for the peak at  $m/z = 705.6$  of  $1 \times 10^{-3} \text{ M Er(NO}_3)_3$  and  $1 \times 10^{-3} \text{ M}$  of  $\text{Me}_2\text{TPhen}$  in acetonitrile

Spectrum Plot - 1/8/2014 11:08 AM

1 A Scan 23 from c:\data\external\cms-66\sample-10-866-msms.xms

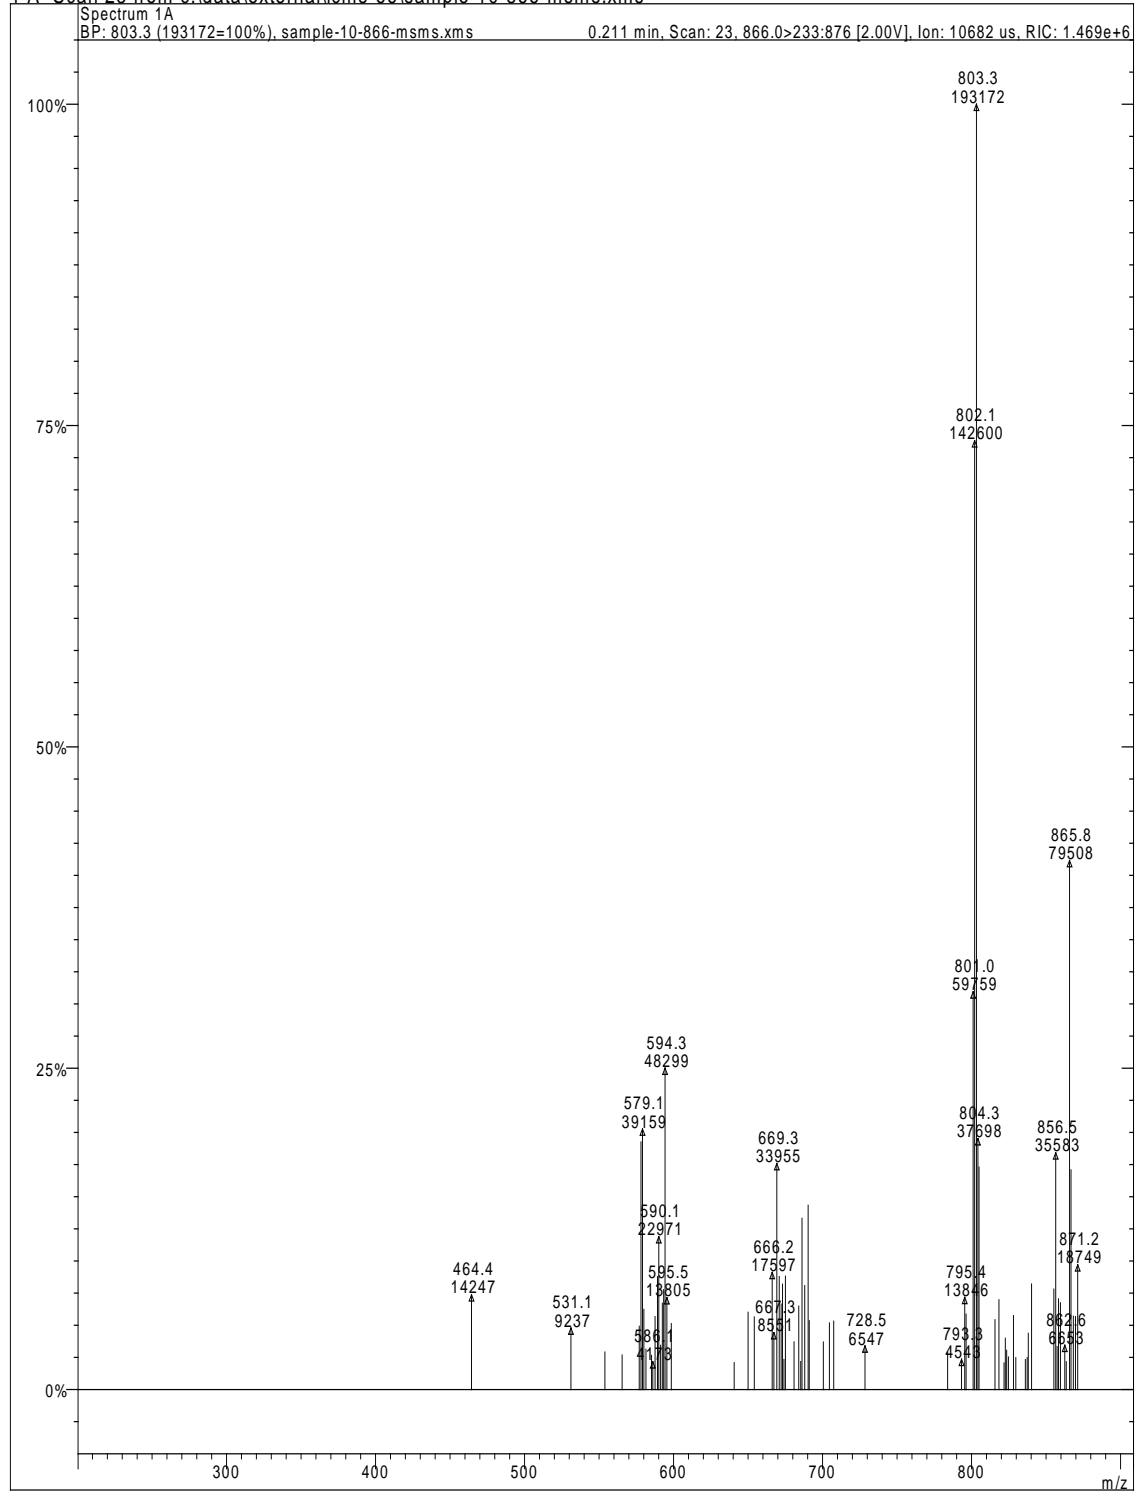

**ESI-10:** The optimized geometries and relative energies of the  $\text{Eu}^{3+}$  complex of  $\text{Me}_2\text{TBipy}$  having mono dentate nitrate ions with respect to that having bidentate nitrate ions

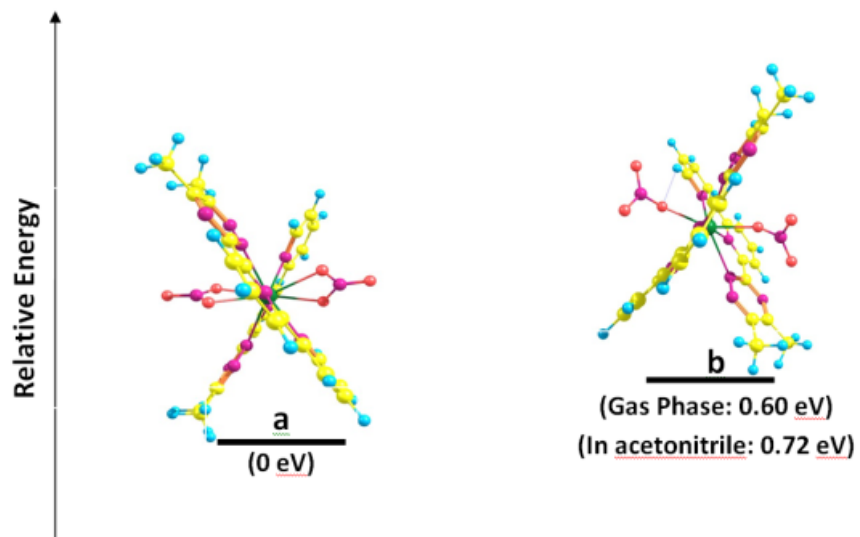

Supplement: c4dt01342e1.pdf [file c4dt01342e1.pdf]
